# Supplementary material for: Biomethane Potential of Selected Organic Waste and Sewage Sludge at Different Temperature Regimes
Source: MDPI journal article supplement (doi:10.3390/en14144217), 2021-07-13
Supplement: s1 [file s1]

## Appendix

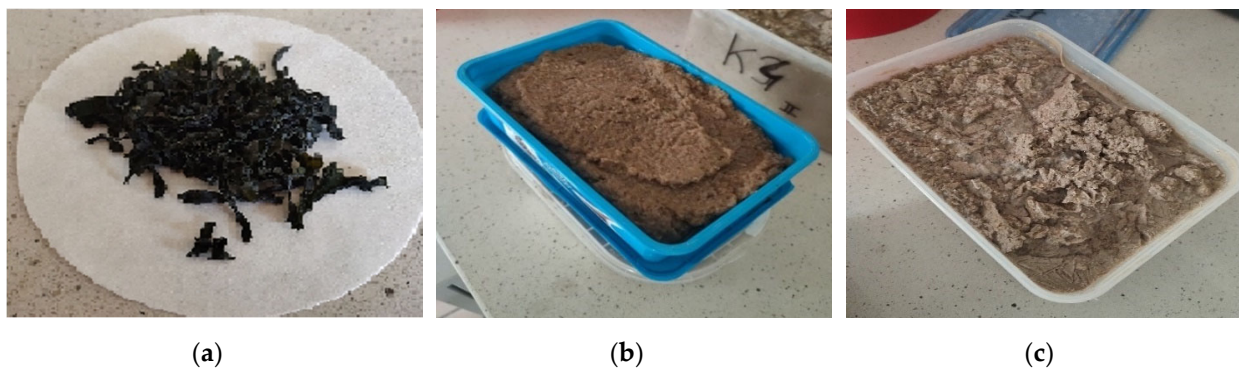

**Figure S1.** Substrates that were used in the study: (a) algae substrate “Wakame”, *Undaria pinnatifida*; (b) OFMSW that was prepared in accordance with the recipe presented in the reference [1]; (c) GTS from the meat processing plant, Silesian region, Poland.

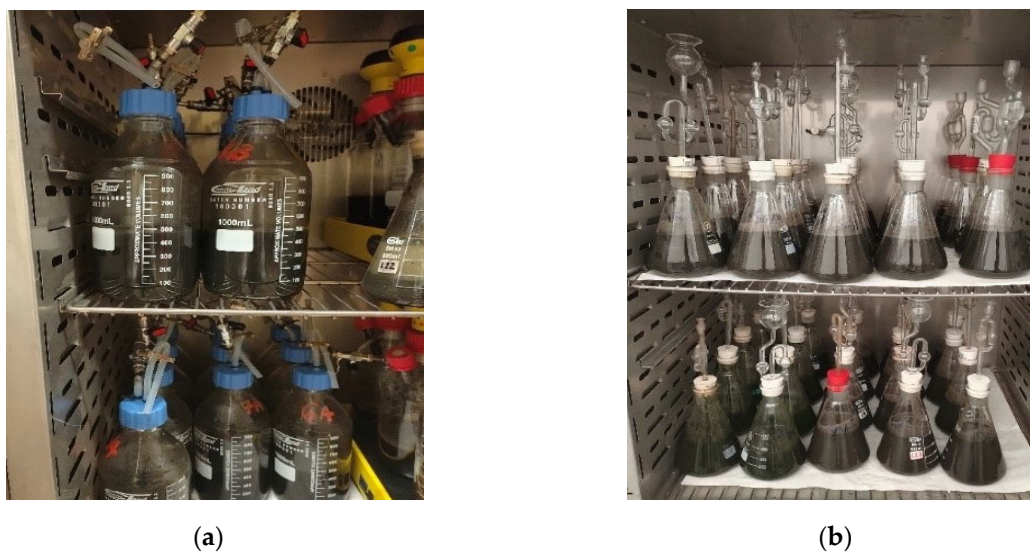

**Figure S2.** Arrangement in incubators: (a) BMP assay; (b) physicochemical analysis.

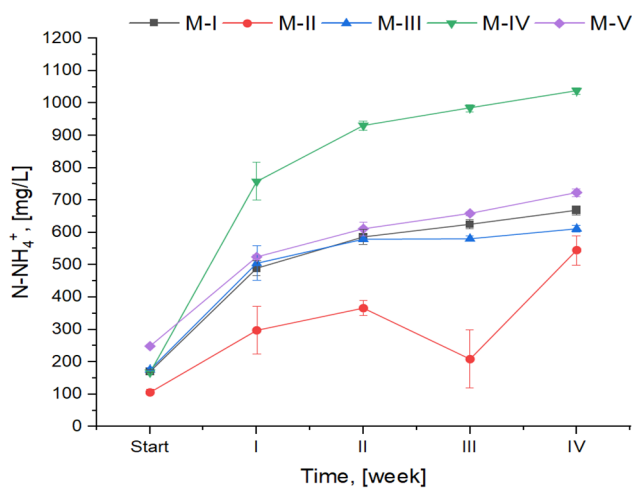

(a)

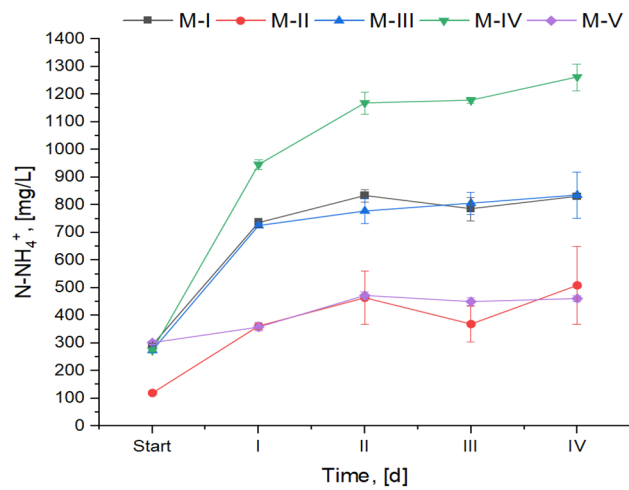

(b)

**Figure S3.** Change of N-NH<sub>4</sub><sup>+</sup> during four-week digestion period: (a) mesophilic temperature; (b) thermophilic temperature.

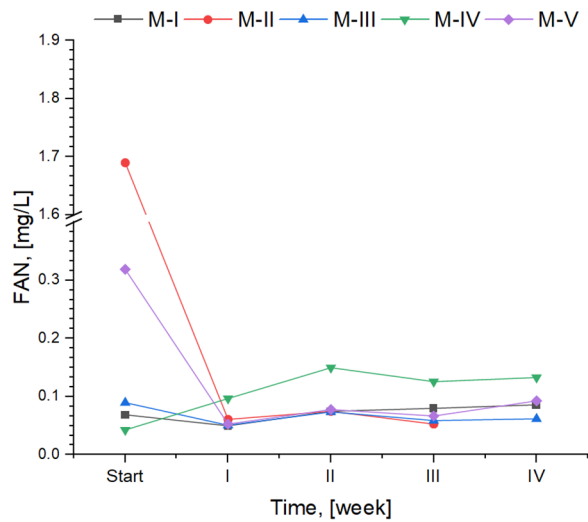

(a)

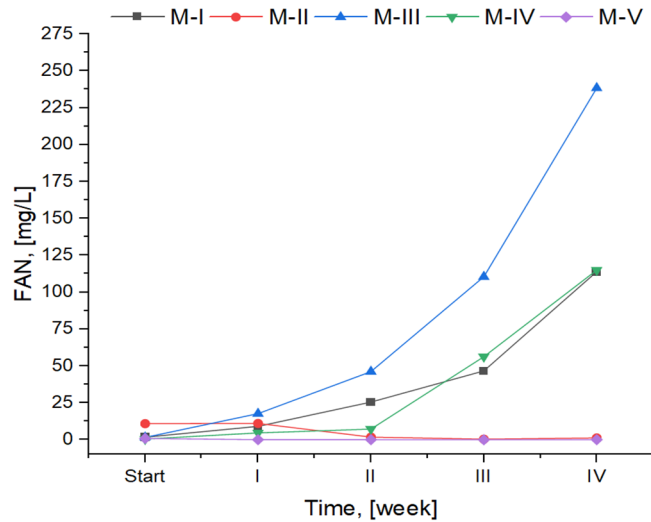

(b)

**Figure S4.** Change of FAN during four-week digestion period: (a) mesophilic temperature; (b) thermophilic temperature.

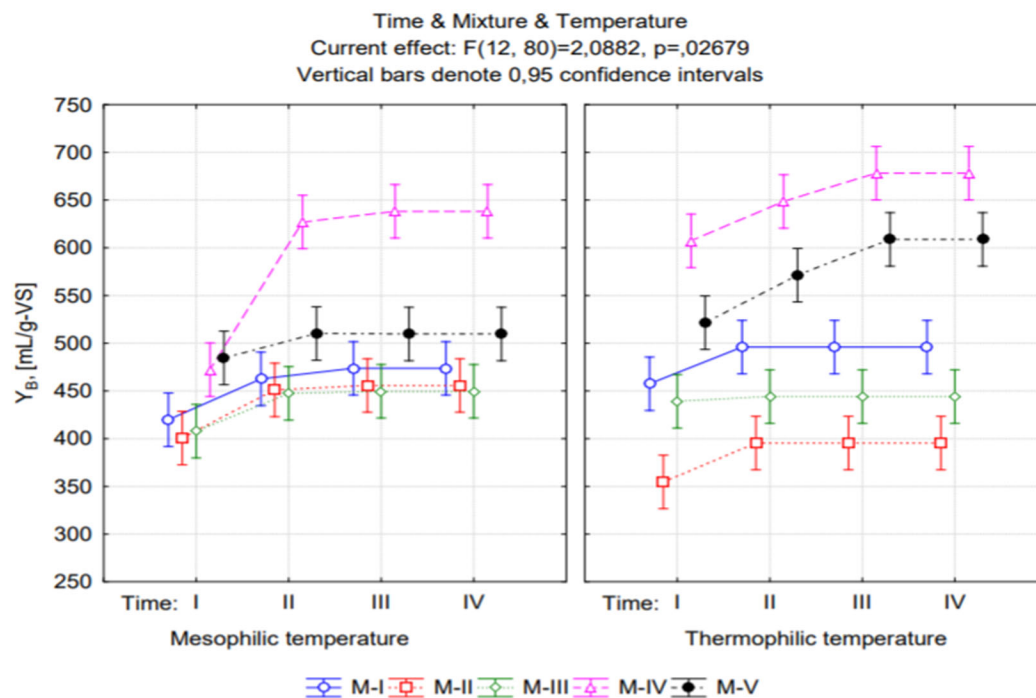

Figure S5. Factorial ANOVA results in relation to the Y<sub>B</sub>.

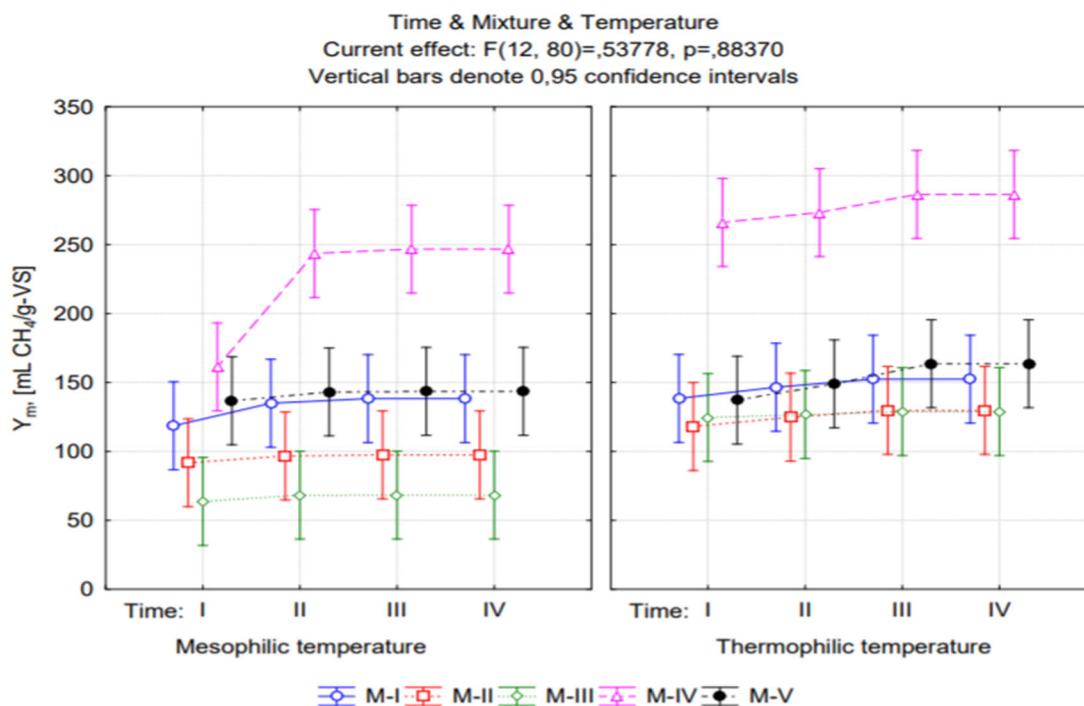

Figure S6. Factorial ANOVA results in relation to the Y<sub>m</sub>.

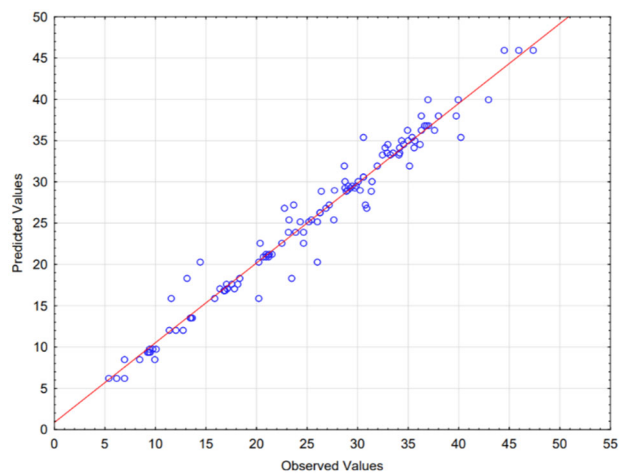

(a)

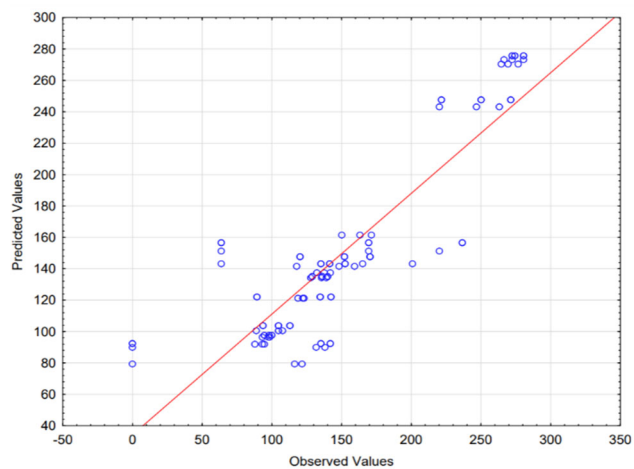

(b)

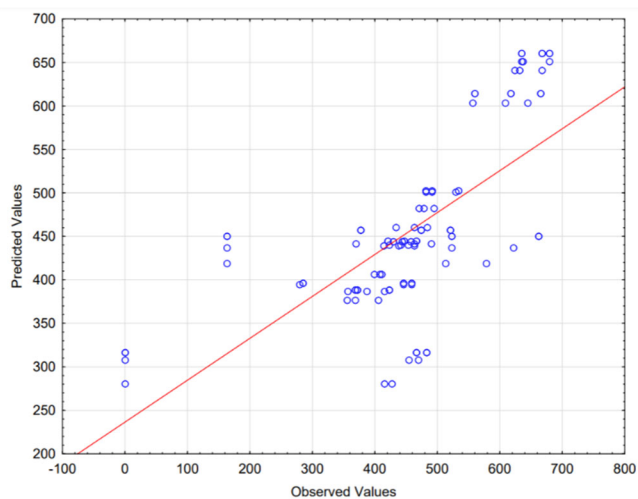

(c)

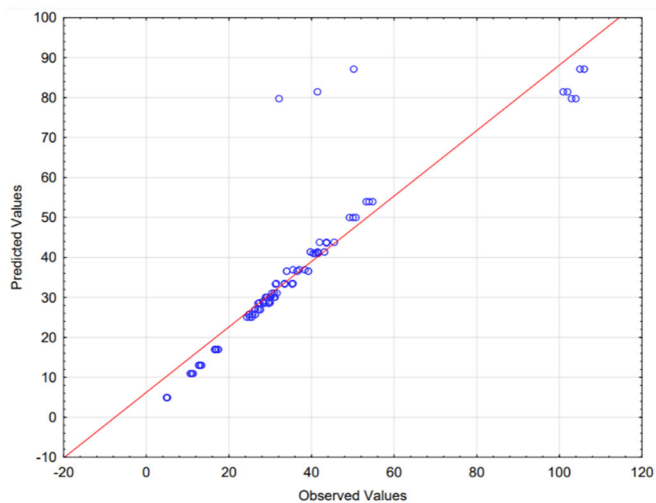

(d)

**Figure S7.** Observed versus predicted values: (a) VS removal; (b)  $Y_m$ ; (c)  $Y_B$ ; (d) variation of methane in biogas.

**Table S1.** Summarizing information regarding to the section and page in [2] for the parameters measured.

| SMEWW     |                           |                                             | PN-ISO 10694:2002 |                                                             | FCBWiŚ (Physicochemical examination of water and wastewater) |                                                                     |  |
|-----------|---------------------------|---------------------------------------------|-------------------|-------------------------------------------------------------|--------------------------------------------------------------|---------------------------------------------------------------------|--|
| Parameter | Section                   | Method                                      | Parameter         | Method                                                      | Parameter                                                    | Method                                                              |  |
| VFA       | 2310, B and 2320, B       | Titration method                            | TC                | Total carbon content and high-temperature combustion method | N-NH <sub>4</sub> <sup>+</sup>                               | Determination of ammoniacal nitrogen after preliminary distillation |  |
| TS        | 2540, B                   | Total solids dried at 103 – 105 °C          |                   |                                                             |                                                              |                                                                     |  |
| VS and FS | 2540, E                   | Fixed and volatile solids ignited at 550 °C | NPOC              |                                                             |                                                              |                                                                     |  |
| KN        | 4500-N <sub>org</sub> , B | Macro-Kjeldahl method                       |                   |                                                             |                                                              |                                                                     |  |

**Table S2.** Measured physicochemical parameters of the studied mixtures.

| Mixture | Week                | VFA/alkalinity |      | N-NH <sub>4</sub> <sup>+</sup><br>(mg/L) |       |        | FAN<br>(mg/L) |       | pH<br>(-) |     |      |     | NPOC<br>(g/L) |      |      |      | TC<br>(mg/g-TS) |       |      |       |      |
|---------|---------------------|----------------|------|------------------------------------------|-------|--------|---------------|-------|-----------|-----|------|-----|---------------|------|------|------|-----------------|-------|------|-------|------|
|         |                     | M              | T    | M                                        | SD    | T      | SD            | M     | T         | M   | SD   | T   | SD            | M    | SD   | T    | SD              | M     | SD   | T     | SD   |
| M-I     | Start <sup>1)</sup> | 3.12           | 2.27 | 170.8                                    | 3.96  | 294    | 3.96          | 0.069 | 1.848     | 5.5 | 0.01 | 6.3 | 0.01          | 1.16 | 0.01 | 1.16 | 0.01            | 446,2 | 3.89 | 433,8 | 9.83 |
|         | I                   | 6.82           | 2.26 | 490                                      | 23.54 | 736.4  | 16.80         | 0.050 | 9.177     | 4.9 | 0.01 | 6.6 | 0.08          | 3.96 | 0.13 | 3.09 | 0.08            | Nm    | Nm   | Nm    | Nm   |
|         | II                  | 5.47           | 1.80 | 586.6                                    | 23.03 | 834.4  | 23.31         | 0.075 | 25.635    | 5   | 0.02 | 7   | 0.51          | 4.22 | 0.00 | 3.03 | 0.43            | Nm    | Nm   | Nm    | Nm   |
|         | III                 | 5.41           | 1.36 | 625.8                                    | 14.73 | 786.8  | 42.28         | 0.080 | 46.800    | 5   | 0.01 | 7.3 | 0.01          | 4.38 | 0.03 | 3    | 0.03            | Nm    | Nm   | Nm    | Nm   |
|         | IV                  | 5.29           | 1.08 | 669.2                                    | 14.82 | 831.6  | 10.72         | 0.086 | 113.997   | 5   | 0.01 | 7.7 | 0.10          | 4.52 | 0.01 | 2.85 | 0.01            | Nm    | Nm   | Nm    | Nm   |
| M-II    | Start <sup>1)</sup> | 0.52           | 0.38 | 106.4                                    | 7.92  | 120.4  | 3.96          | 1.690 | 10.969    | 7.1 | 0.00 | 7.5 | 0.01          | 0.55 | 0.03 | 0.76 | 0.01            | 339,3 | 7.57 | 336,7 | 6.01 |
|         | I                   | 4.05           | 1.06 | 298.2                                    | 73.35 | 362.6  | 12.42         | 0.061 | 11.140    | 5.2 | 0.11 | 7   | 0.01          | 4.55 | 0.13 | 3.11 | 0.18            | Nm    | Nm   | Nm    | Nm   |
|         | II                  | 3.92           | 2.51 | 366.8                                    | 23.09 | 464.8  | 97.42         | 0.075 | 1.847     | 5.2 | 0.01 | 6.1 | 0.85          | 4.91 | 0.19 | 5.32 | 0.58            | Nm    | Nm   | Nm    | Nm   |
|         | III                 | 3.24           | 2.91 | 209.06                                   | 91.05 | 369.6  | 64.66         | 0.053 | 0.466     | 5.3 | 0.06 | 5.6 | 0.25          | 4.81 | 0.33 | 5.66 | 0.07            | Nm    | Nm   | Nm    | Nm   |
|         | IV                  | 2.95           | 2.56 | 546                                      | 46.21 | 509.6  | 142.41        | 0.880 | 1.280     | 6.1 | 1.28 | 5.9 | 0.53          | 4.36 | 0.30 | 5.51 | 0.02            | Nm    | Nm   | Nm    | Nm   |
| M-III   | Start <sup>1)</sup> | 3.24           | 2.14 | 176.4                                    | 3.96  | 274.4  | 7.92          | 0.090 | 1.724     | 5.6 | 0.00 | 6.3 | 0.01          | 1.22 | 0.01 | 1.43 | 0.01            | 432,4 | 6.43 | 413,5 | 2.47 |
|         | I                   | 6.21           | 1.87 | 505.4                                    | 54.17 | 725.9  | 10.06         | 0.051 | 17.827    | 4.9 | 0.05 | 6.9 | 0.02          | 4.24 | 0.04 | 3.18 | 0.01            | Nm    | Nm   | Nm    | Nm   |
|         | II                  | 5.08           | 1.25 | 579.6                                    | 3.96  | 778.4  | 46.18         | 0.074 | 46.300    | 5   | 0.00 | 7.3 | 0.07          | 4.53 | 0.00 | 3.22 | 0.26            | Nm    | Nm   | Nm    | Nm   |
|         | III                 | 6.25           | 1.00 | 581                                      | 8.40  | 806.4  | 39.86         | 0.059 | 110.543   | 4.9 | 0.02 | 7.7 | 0.03          | 4.85 | 0.01 | 2.79 | 0.42            | Nm    | Nm   | Nm    | Nm   |
|         | IV                  | 6.25           | 0.54 | 611.8                                    | 9.56  | 836.2  | 84.06         | 0.062 | 238.502   | 4.9 | 0.04 | 8.1 | 0.14          | 5.08 | 0.10 | 1.68 | 0.03            | Nm    | Nm   | Nm    | Nm   |
| M-IV    | Start <sup>1)</sup> | 4.37           | 2.44 | 168                                      | 0.00  | 274.4  | 7.92          | 0.043 | 0.548     | 5.3 | 0.00 | 5.8 | 0.01          | 1.4  | 0.01 | 1.37 | 0.01            | 451,7 | 1.13 | 463,7 | 2.40 |
|         | I                   | 4.99           | 2.32 | 757.8                                    | 59.35 | 946.4  | 18.00         | 0.097 | 4.731     | 5   | 0.03 | 6.2 | 0.09          | 5.22 | 0.09 | 5.04 | 0.12            | Nm    | Nm   | Nm    | Nm   |
|         | II                  | 4.43           | 2.42 | 931                                      | 14.73 | 1169   | 39.17         | 0.150 | 7.347     | 5.1 | 0.02 | 6.3 | 0.08          | 5.81 | 0.01 | 5.31 | 0.06            | Nm    | Nm   | Nm    | Nm   |
|         | III                 | 5.48           | 1.72 | 985.6                                    | 11.20 | 1178.8 | 10.72         | 0.126 | 56.385    | 5   | 0.01 | 7.2 | 0.16          | 6.54 | 0.21 | 5.22 | 0.03            | Nm    | Nm   | Nm    | Nm   |
|         | IV                  | 5.42           | 1.51 | 1038.8                                   | 10.72 | 1262.8 | 48.71         | 0.133 | 115.043   | 5   | 0.02 | 7.5 | 0.01          | 6.97 | 0.10 | 5.26 | 0.03            | Nm    | Nm   | Nm    | Nm   |
| M-V     | Start <sup>1)</sup> | 2.43           | 2.35 | 249.2                                    | 3.96  | 302.4  | 0.00          | 0.319 | 0.955     | 6   | 0.01 | 6   | 0.01          | 3.13 | 0.00 | 2.96 | 0.03            | 406   | 2.47 | 436,4 | 1.77 |
|         | I                   | 7.87           | 4.13 | 525                                      | 7.05  | 358.4  | 15.84         | 0.053 | 0.180     | 4.9 | 0.01 | 5.2 | 0.03          | 5.89 | 0.00 | 5.57 | 0.07            | Nm    | Nm   | Nm    | Nm   |
|         | II                  | 5.73           | 5.35 | 611.8                                    | 21.14 | 473.2  | 14.09         | 0.078 | 0.150     | 5   | 0.03 | 5   | 0.01          | 6.36 | 0.03 | 6.64 | 0.04            | Nm    | Nm   | Nm    | Nm   |
|         | III                 | 6.05           | 6.35 | 659.4                                    | 5.36  | 450.8  | 14.09         | 0.067 | 0.113     | 4.9 | 0.03 | 4.9 | 0.02          | 6.69 | 0.01 | 7.25 | 0.27            | Nm    | Nm   | Nm    | Nm   |
|         | IV                  | 5.34           | 5.23 | 723.8                                    | 12.42 | 462    | 10.72         | 0.093 | 0.146     | 5   | 0.06 | 5   | 0.09          | 7.02 | 0.06 | 6.58 | 0.04            | Nm    | Nm   | Nm    | Nm   |

Nm – not measured

<sup>1)</sup> – Before pH correction

**Table S3.** Comparison of methane yields of different co-digestion mixture after treated in wet AcD.

| Anaerobic conditions                                                                                                                      | Feedstock                                                                          | Mixture (% of VS content) | Ym (NmL CH <sub>4</sub> /g VS) | Enhanced yield (%)                 | Reference |
|-------------------------------------------------------------------------------------------------------------------------------------------|------------------------------------------------------------------------------------|---------------------------|--------------------------------|------------------------------------|-----------|
| <b>Sewage sludge + algae</b>                                                                                                              |                                                                                    |                           |                                |                                    |           |
| Batch, 37°C, 1.2 L bottles<br>Duration: 27 days                                                                                           | <i>Chlorella sorokiniana</i> and <i>Scenedesmus</i> sp. (AB)                       | 100                       | 331 ± 76                       | -                                  | [3]       |
|                                                                                                                                           | activated sludge (AS) after the aerobic phase                                      | 100                       | 363 ± 68                       | -                                  |           |
|                                                                                                                                           | activated sludge (AS) after the aerobic phase/AB                                   | 90/10                     | 400 ± 22                       | 10 <sup>1</sup> /21 <sup>2</sup>   |           |
|                                                                                                                                           | activated sludge (AS) after the anaerobic phase                                    | 100                       | 449 ± 17                       | -                                  |           |
|                                                                                                                                           | activated sludge (AS) after the anaerobic phase/AB                                 | 90/10                     | 560 ± 24                       | 25 <sup>1</sup> /69 <sup>2</sup>   |           |
| Batch, 37°C, 1 L conical flasks (working volume: 0.7 L),<br>loading rate: 3 g VS/L<br>S/I ratio 1:2 based on VS;<br>Duration: 35 days     | Microalgae A—wet from lake (MA) - <i>Scenedesmus</i> and <i>Chlorella vulgaris</i> | 100                       | 367 ± 5                        | -                                  | [4]       |
|                                                                                                                                           | Sewage sludge (mixed WAS + PS)                                                     | 100                       | 331 ± 35                       | -                                  |           |
|                                                                                                                                           | Sewage sludge (mixed WAS + PS) /MA                                                 | 88/12                     | 344 ± 15                       | 4 <sup>1</sup> /–6 <sup>2</sup>    |           |
|                                                                                                                                           | Sewage sludge (mixed WAS + PS)/MA                                                  | 75/25                     | 458 ± 61                       | 38 <sup>1</sup> /25 <sup>2</sup>   |           |
|                                                                                                                                           | Sewage sludge (mixed WAS + PS)/MA                                                  | 63/37                     | 408 ± 17                       | 23 <sup>1</sup> /11 <sup>2</sup>   |           |
|                                                                                                                                           | Microalgae—dry cultivated in municipal wastewater (MB)— <i>Scenedesmus</i>         | 100                       | 179 ± 38                       | -                                  |           |
|                                                                                                                                           | Sewage sludge (mixed WAS + PS)/MB                                                  | 88/12                     | 387 ± 67                       | 17 <sup>1</sup> /116 <sup>2</sup>  |           |
|                                                                                                                                           | Sewage sludge (mixed WAS + PS)/MB                                                  | 75/25                     | 348 ± 65                       | 5 <sup>1</sup> /94 <sup>2</sup>    |           |
| Batch, 55°C, 0.1 L conical bottles (working volume: 0.07 L),<br>loading rate: 3 g VS/L<br>S/I ratio 1:2 based on VS;<br>Duration: 35 days | Sewage sludge (mixed WAS + PS)/MB                                                  | 63/37                     | 325 ± 67                       | –2 <sup>1</sup> /81.5 <sup>2</sup> |           |
|                                                                                                                                           | Microalgae A—wet from lake (MA)                                                    | 100                       | 317 ± 53                       | -                                  | [4]       |
|                                                                                                                                           | Sewage sludge (mixed WAS + PS)                                                     | 100                       | 363 ± 6                        | -                                  |           |
|                                                                                                                                           | Sewage sludge (mixed WAS + PS) /MA                                                 | 88/12                     | 388 ± 75                       | 7 <sup>1</sup> /22 <sup>2</sup>    |           |
|                                                                                                                                           | Sewage sludge (mixed WAS + PS)/MA                                                  | 75/25                     | 338 ± 65                       | –7 <sup>1</sup> /7 <sup>2</sup>    |           |
|                                                                                                                                           | Sewage sludge (mixed WAS + PS)/MA                                                  | 63/37                     | 321 ± 15                       | –12 <sup>1</sup> /1 <sup>2</sup>   |           |
|                                                                                                                                           | Microalgae B—dry cultivated in municipal wastewater (MB)                           | 100                       | 150 ± 13                       | -                                  |           |
|                                                                                                                                           | Sewage sludge (mixed WAS + PS)/MB                                                  | 88/12                     | 323 ± 8                        | –11 <sup>1</sup> /115 <sup>2</sup> |           |
|                                                                                                                                           | Sewage sludge (mixed WAS + PS)/MB                                                  | 75/25                     | 298 ± 55                       | –18 <sup>1</sup> /99 <sup>2</sup>  |           |
|                                                                                                                                           | Sewage sludge (mixed WAS + PS)/MB                                                  | 63/37                     | 276 ± 10                       | –24 <sup>1</sup> /84 <sup>2</sup>  |           |

|                                                                                                                                                               |                                                                                       |                                |          |                                     |     |
|---------------------------------------------------------------------------------------------------------------------------------------------------------------|---------------------------------------------------------------------------------------|--------------------------------|----------|-------------------------------------|-----|
| Batch, 33°C, 0.12 mL bottles, substrate amount was 0.12 g volatile solids (VS), stirring rate of 130 rpm<br>Duration: 35 days                                 | <i>Isochrysis galbana</i> , marine species                                            | 100                            | 338 ± 3  | -                                   | [5] |
|                                                                                                                                                               | mixed WAS + PS                                                                        | 100                            | 347 ± 9  | -                                   |     |
|                                                                                                                                                               | mixed WAS + PS / <i>Isochrysis galbana</i>                                            | 75/25                          | 318 ± 5  | -8 <sup>1</sup> /-6 <sup>2</sup>    |     |
|                                                                                                                                                               | mixed WAS + PS / <i>Isochrysis galbana</i>                                            | 50/50                          | 356      | 3 <sup>1</sup> /5 <sup>2</sup>      |     |
|                                                                                                                                                               | mixed WAS + PS / <i>Isochrysis galbana</i>                                            | 25/75                          | 343      | -1 <sup>1</sup> /1 <sup>2</sup>     |     |
|                                                                                                                                                               | <i>Selenastrum capricornutum</i> , freshwater species                                 | 100                            | 209 ± 5  | -                                   |     |
|                                                                                                                                                               | mixed WAS + PS / <i>Selenastrum capricornutum</i>                                     | 75/25                          | 303 ± 11 | -13 <sup>1</sup> /45 <sup>2</sup>   |     |
|                                                                                                                                                               | mixed WAS + PS / <i>Selenastrum capricornutum</i>                                     | 50/50                          | 302 ± 3  | -13 <sup>1</sup> /44 <sup>2</sup>   |     |
|                                                                                                                                                               | mixed WAS + PS / <i>Selenastrum capricornutum</i>                                     | 25/75                          | 254 ± 5  | -17 <sup>1</sup> /21.5 <sup>2</sup> |     |
| Batch, 50°C, 0.12 mL bottles, substrate amount was 0.12 g volatile solids (VS), stirring rate of 130 rpm<br>Duration: 57 days                                 | <i>Isochrysis galbana</i> , marine species                                            | 100                            | 464 ± 4  | -                                   | [6] |
|                                                                                                                                                               | mixed WAS + PS                                                                        | 100                            | 219 ± 1  | -                                   |     |
|                                                                                                                                                               | mixed WAS + PS / <i>Isochrysis galbana</i>                                            | 75/25                          | 420      | 92 <sup>1</sup> /-9.5 <sup>2</sup>  |     |
|                                                                                                                                                               | mixed WAS + PS / <i>Isochrysis galbana</i>                                            | 50/50                          | 340      | -55 <sup>1</sup> /-27 <sup>2</sup>  |     |
|                                                                                                                                                               | mixed WAS + PS / <i>Isochrysis galbana</i>                                            | 25/75                          | 259      | 18 <sup>1</sup> /-44 <sup>2</sup>   |     |
|                                                                                                                                                               | <i>Selenastrum capricornutum</i> , freshwater species                                 | 100                            | 152 ± 6  | -                                   |     |
|                                                                                                                                                               | mixed WAS + PS / <i>Selenastrum capricornutum</i>                                     | 75/25                          | 370      | 69 <sup>1</sup> /143 <sup>2</sup>   |     |
|                                                                                                                                                               | mixed WAS + PS / <i>Selenastrum capricornutum</i>                                     | 50/50                          | 286      | 30.5 <sup>1</sup> /88 <sup>2</sup>  |     |
|                                                                                                                                                               | mixed WAS + PS / <i>Selenastrum capricornutum</i>                                     | 25/75                          | 201      | -8 <sup>1</sup> /32 <sup>2</sup>    |     |
| Batch, 35°C, 0.13 mL bottles (working volume), inoculum to substrate ratio of 2 (VS basis); addition, 130 µL of a trace element solution<br>Duration: 27 days | <i>Chlorella sorokiniana</i>                                                          | 100                            | 362      | -                                   | [7] |
|                                                                                                                                                               | WAS                                                                                   | 100                            | 318      | -                                   |     |
|                                                                                                                                                               | WAS/ <i>Chlorella sorokiniana</i>                                                     | 75/25                          | 442      | 39 <sup>1</sup> /22 <sup>2</sup>    |     |
|                                                                                                                                                               | WAS/ <i>Chlorella sorokiniana</i>                                                     | 50/50                          | 380      | 19 <sup>1</sup> /5 <sup>2</sup>     |     |
|                                                                                                                                                               | WAS/ <i>Chlorella sorokiniana</i>                                                     | 25/75                          | 354      | 11 <sup>1</sup> /-2 <sup>2</sup>    |     |
| Batch, 37°C, serum bottle with a working volume of 0.1 L,<br>Duration: 20 days                                                                                | <i>Micractinium</i> sp. Isolated from the wall of a primary clarifier at a local WWTP | 100                            | 230      | -                                   | [8] |
|                                                                                                                                                               | WAS                                                                                   | 100                            | 243      | -                                   |     |
|                                                                                                                                                               | WAS/ <i>Micractinium</i> sp                                                           | 79/21                          | 253      | 4 <sup>1</sup> /10 <sup>2</sup>     |     |
|                                                                                                                                                               | <i>Chlorella</i> sp. Isolated from the wall of a primary clarifier at a local WWTP    | 100                            | 209      | -                                   |     |
|                                                                                                                                                               | WAS/ <i>Chlorella</i> sp                                                              | 79/21                          | 236      | -3 <sup>1</sup> /13 <sup>2</sup>    |     |
| Batch, 35°C, 1 L fermentation glass bottles,<br>Duration: 26 days                                                                                             | dehydrated <i>Ulva</i> macroalgae powder/sewage sludge                                | 6% (wt/wt) algae concentration | 149      | -                                   | [8] |



|                                                                                                                                                                                                               |                                                                                             |       |          |                                      |      |
|---------------------------------------------------------------------------------------------------------------------------------------------------------------------------------------------------------------|---------------------------------------------------------------------------------------------|-------|----------|--------------------------------------|------|
| Batch, 35°C, 0.5 L flask (0.3 working volume), inoculum to substrate ratio of 1 (VS basis); stirring rate of 100 rpm                                                                                          | Macroalgal residue (MAR) - <i>Gelidium sesquipedale</i>                                     | 100   | 253 ± 4  | -                                    | [9]  |
|                                                                                                                                                                                                               | thickened waste activated sludge (TWAS)                                                     | 100   | 127 ± 1  | -                                    |      |
|                                                                                                                                                                                                               | TWAS/MAR                                                                                    | 50:50 | 182 ± 2  | 43 <sup>1</sup> /–28 <sup>2</sup>    |      |
|                                                                                                                                                                                                               | TWAS/MAR + pre-treatment of MAR (Alkaline KOH-5%)                                           | 50:50 | 281 ± 10 | 121 <sup>1</sup> /11 <sup>2</sup>    |      |
|                                                                                                                                                                                                               | TWAS/MAR + pre-treatment of MAR (Acid H <sub>3</sub> PO <sub>4</sub> -5% and heating–70 °C) | 50:50 | 252 ± 6  | 98 <sup>1</sup> /–0.4 <sup>2</sup>   |      |
|                                                                                                                                                                                                               | TWAS/MAR + pre-treatment of MAR (Heating–70 °C)                                             | 50:50 | 263 ± 2  | 107 <sup>1</sup> /4 <sup>2</sup>     |      |
| Batch, 35°C, 0.16 L serum bottles, inoculum to substrate ratio of 0.5 g CODVS/g VS                                                                                                                            | Microalgae (M)                                                                              | 100   | 82 ± 10  | -                                    | [10] |
|                                                                                                                                                                                                               | WAS                                                                                         | 100   | 139 ± 3  | -                                    |      |
|                                                                                                                                                                                                               | Pretreatment M (PM)                                                                         | 100   | 134 ± 6  | -                                    |      |
|                                                                                                                                                                                                               | Pretreatment WAS (PWAS)                                                                     | 100   | 204 ± 3  | -                                    |      |
|                                                                                                                                                                                                               | Pretreatment (WAS + M)                                                                      | 20/80 | 187 ± 9  | 34.5 <sup>1</sup> /128 <sup>2</sup>  |      |
|                                                                                                                                                                                                               | Pretreatment (WAS + M)                                                                      | 50/50 | 162 ± 6  | 16.5 <sup>1</sup> /97.5 <sup>2</sup> |      |
|                                                                                                                                                                                                               | Pretreatment (WAS + M)                                                                      | 80/20 | 132 ± 2  | –5 <sup>1</sup> /61 <sup>2</sup>     |      |
| Algae + other organic waste                                                                                                                                                                                   |                                                                                             |       |          |                                      |      |
| Batch, 50°C, 1 L (0.7 working volume), stirring rate of 600 rpm                                                                                                                                               | Food waste                                                                                  | 100   | 537 ± 19 | -                                    | [11] |
|                                                                                                                                                                                                               | Algal biomass                                                                               | 100   | 300 ± 11 | -                                    |      |
|                                                                                                                                                                                                               | Food waste/ algal biomass                                                                   | 75/25 | 496 ± 36 | –8 <sup>3</sup> /65 <sup>2</sup>     |      |
|                                                                                                                                                                                                               | Food waste/ algal biomass                                                                   | 50/50 | 427 ± 28 | –20.5 <sup>3</sup> /42 <sup>2</sup>  |      |
|                                                                                                                                                                                                               | Food waste/ algal biomass                                                                   | 25/75 | 390 ± 30 | –27 <sup>3</sup> /30 <sup>2</sup>    |      |
| Batch, 55°C<br>Organic loads for organic peels (i.e., 2.5, 3, and 5 kgVS/m <sup>3</sup> ) and seaweed (i.e., 3 and 4 kgVS/m <sup>3</sup> ); inoculum to substrate ratio of 2 (VS basis);<br>Duration: 30 days | Seaweed                                                                                     | 100   | 349 ± 10 | -                                    | [12] |
|                                                                                                                                                                                                               | Orange peels                                                                                | 100   | 398 ± 94 | -                                    |      |
|                                                                                                                                                                                                               | Orange peels/ seaweed                                                                       | 30/70 | 355 ± 5  | 2 <sup>2</sup>                       |      |
|                                                                                                                                                                                                               | Orange peels/ seaweed                                                                       | 50/50 | 323 ± 4  | –7.5 <sup>2</sup>                    |      |
|                                                                                                                                                                                                               | Orange peels/ seaweed                                                                       | 70/30 | 375 ± 15 | 7 <sup>2</sup>                       |      |
| Batch, 35°C, 0.1 L<br>substrate to inoculum (S/I) ratio: 0.5 g COD/g VS<br>Duration: 60 days                                                                                                                  | Microalgal biomass (MA)                                                                     | 100   | 140 ± 4  | -                                    | [13] |
|                                                                                                                                                                                                               | Pretreated Microalgal biomass (PMA)                                                         | 100   | 226 ± 1  | -                                    |      |
|                                                                                                                                                                                                               | thickened primary sludge (TPS)                                                              | 100   | 299 ± 1  | -                                    |      |
|                                                                                                                                                                                                               | fat, oil and grease from WWTP (FOG)                                                         | 100   | 563 ± 15 | -                                    |      |
|                                                                                                                                                                                                               | MA/TPS                                                                                      | 50/50 | 207 ± 5  | –31 <sup>1</sup> /48 <sup>2</sup>    |      |

|                                                                                                                  |                                                                            |                |                    |                                      |      |
|------------------------------------------------------------------------------------------------------------------|----------------------------------------------------------------------------|----------------|--------------------|--------------------------------------|------|
|                                                                                                                  | PMA/TPS                                                                    | 50/50          | 237 ± 1            | −21 <sup>1</sup> /69 <sup>2</sup>    |      |
|                                                                                                                  | MA/TPS                                                                     | 50/50 + 10%FOG | 259 ± 13           | −13 <sup>1</sup> /85 <sup>2</sup>    |      |
|                                                                                                                  | PMA/TPS                                                                    | 50/50 + 10%FOG | 298 ± 12           | −0. 3 <sup>1</sup> /113 <sup>2</sup> |      |
|                                                                                                                  | MA/TPS                                                                     | 50/50 + 20%FOG | 293 ± 8            | −2 <sup>1</sup> /109 <sup>2</sup>    |      |
|                                                                                                                  | PMA/TPS                                                                    | 50/50 + 20%FOG | 334 ± 10           | 12 <sup>1</sup> /138 <sup>2</sup>    |      |
| Batch, 35-38°C, 2 L<br>substrate to inoculum (S/I) ratio: 1 w/v<br>Duration: 46 days                             | <i>Spirulina subsalsa</i>                                                  | 100            | 81.40 <sup>4</sup> | -                                    |      |
|                                                                                                                  | Paddy straw                                                                | 100            | 231.5 <sup>4</sup> | -                                    |      |
|                                                                                                                  | Paddy straw/ <i>Spirulina subsalsa</i>                                     | 80/20          | 246 <sup>4</sup>   | 2032                                 | [14] |
|                                                                                                                  | Paddy straw/ <i>Spirulina subsalsa</i>                                     | 70/30          | 260 <sup>4</sup>   | 221 <sup>2</sup>                     |      |
|                                                                                                                  | Paddy straw/ <i>Spirulina subsalsa</i>                                     | 50/50          | 250 <sup>4</sup>   | 208 <sup>2</sup>                     |      |
|                                                                                                                  | Paddy straw/ <i>Spirulina subsalsa</i>                                     | 30/70          | 190 <sup>4</sup>   | 134 <sup>2</sup>                     |      |
| Batch, 35°C, 0.15 L<br>substrate to inoculum (S/I) ratio: 1, stirring rate of 150 rpm<br>Duration: 30 days       | Taihu blue algae                                                           | 100            | 201                |                                      | [15] |
|                                                                                                                  | Taihu blue algae/ corn straw                                               | 20/80          | 325                | 62 <sup>2</sup>                      |      |
| Batch, 53°C, 0.337 L (0.1 L working volume)<br>organic load: 2gVS/L<br>Duration: 25 days                         | piggery slurry                                                             | 100            | 255 ± 65           | -                                    |      |
|                                                                                                                  | <i>Nannochloropsis limnetica</i> / piggery slurry                          | 40/60          | 355 ± 27           | 39 <sup>5</sup>                      | [16] |
| Batch, 37°C, 0.305 L (0.25 L working volume)<br>Inoculum: 10% v/v<br>All samles load: 3% TS<br>Duration: 90 days | oil-extracted microalgae biomass from <i>Chlorella vulgaris</i> powder (M) | -              | -                  | -                                    |      |
|                                                                                                                  | Glicerol (G)                                                               | 100            | 113.2              | -                                    |      |
|                                                                                                                  | Chicken Litter (CL)                                                        | -              | -                  | -                                    |      |
|                                                                                                                  | M/G/CL                                                                     | 0/1.5/98.5     | 97.4               | −14 <sup>6</sup>                     |      |
|                                                                                                                  | M/G/CL                                                                     | 0/3/97         | 116.7              | 3 <sup>6</sup>                       |      |
|                                                                                                                  | M/G/CL                                                                     | 5/0.5/95.5     | 115.5              | 2 <sup>6</sup>                       |      |
|                                                                                                                  | M/G/CL                                                                     | 10/1/89        | 188.3              | 66 <sup>6</sup>                      | [17] |
|                                                                                                                  | M/G/CL                                                                     | 15/0/85        | 177.8              | -                                    |      |
|                                                                                                                  | M/G/CL                                                                     | 15/1.5/83.5    | 122.3              | 8 <sup>6</sup>                       |      |
|                                                                                                                  | M/G/CL                                                                     | 20/2/78        | 116.5              | 3 <sup>6</sup>                       |      |
|                                                                                                                  | M/G/CL                                                                     | 25/2.5/72.5    | 127.7              | 13 <sup>6</sup>                      |      |
|                                                                                                                  | M/G/CL                                                                     | 30/0/70        | 129.6              | -                                    |      |
|                                                                                                                  | M/G/CL                                                                     | 30/3/67        | 131.1              | 16 <sup>6</sup>                      |      |

<sup>1</sup>—compared to AD of sewage sludge alone; <sup>2</sup>—compared to AD of algal biomass alone; <sup>3</sup>—compared to AD of food waste alone; <sup>4</sup> —ultimate biogas yield;

<sup>5</sup>—compared to AD of piggery slurry alone; <sup>6</sup>—compared to AD of glycerol alone; WAS—waste activated sludge; PS—primary sludge.

**Table B4** Methane potential of different raw organic waste

| Substrate                                                             | Methane yield<br>(m <sup>3</sup> /Mg VS <sub>add</sub> ) | Reference |
|-----------------------------------------------------------------------|----------------------------------------------------------|-----------|
| Sewage sludge                                                         | 260–460                                                  | [18]      |
| Sewage sludge                                                         | 220                                                      |           |
| Sewage sludge                                                         | 186                                                      |           |
| Sewage sludge                                                         | 143                                                      |           |
| Floating sludges (fat)                                                | 600–700                                                  |           |
| Fat (separators)                                                      | 700 (1000)                                               |           |
| Grease trap sludge                                                    | 845–928                                                  |           |
| <i>Chlorella sorokiniana</i>                                          | 220–280                                                  | [19]      |
| <i>Spirulina maxima</i>                                               | 250340                                                   |           |
| <i>Spirulina dunaliella</i>                                           | 120–140                                                  |           |
| <i>Scenedesmus obliquus</i>                                           | 180                                                      |           |
| <i>Macrocystis pyrifera</i>                                           | 227–310                                                  |           |
| <i>Ascophyllum nodosum</i>                                            | 110                                                      |           |
| <i>Laminaria saccharina</i>                                           | 230                                                      |           |
| <i>Laminaria hyperborea</i>                                           | 280                                                      |           |
| <i>Saccharina latissima</i>                                           | 127                                                      |           |
| <i>Saccharina latissimi</i> after steam exploded at 130 °C for 10 min | 155                                                      |           |
| <i>Dunaliella tertiolecta</i>                                         | 24 <sup>1</sup>                                          | [20]      |
| <i>Dunaliella salina</i>                                              | 505 <sup>1</sup>                                         |           |
| <i>Nannochloropsis oculata</i>                                        | 204 <sup>1</sup>                                         |           |
| <i>Sewage sludge</i>                                                  | 115–300 <sup>2</sup>                                     |           |
| <i>Sewage sludge</i>                                                  | 20–190 <sup>3</sup>                                      |           |
| <i>Sewage sludge</i>                                                  | 93–121 <sup>4</sup>                                      |           |

<sup>1</sup>—mL/g VS; <sup>2</sup>—High-solid anaerobic digestion in continuous bioreactors; <sup>3</sup>—High-solid anaerobic digestion in batch bioreactors; <sup>4</sup>—biogas yield, m<sup>3</sup>/Mg VS<sub>add</sub>.

## SUPPLEMENTARY REFERENCES

1. Neczaj, E.; Grosser, A.; Worwag, M. Boosting production of methane from sewage sludge by addition of grease trap sludge. *Environ. Prot. Eng.* 2013, 39, 125–133, doi:10.5277/EPE130212.
2. Jenkins, S.H. Standard Methods for the Examination of Water and Wastewater. *Water Res.* 1982, 16, 1495–1496, doi:10.1016/0043-1354(82)90249-4.
3. Wágner, D.S.; Radovici, M.; Smets, B.F.; Angelidaki, I.; Valverde-Pérez, B.; Plósz, B.G. Harvesting microalgae using activated sludge can decrease polymer dosing and enhance methane production via co-digestion in a bacterial-microbial process. *Algal Res.* 2016, 20, 197–204, doi:10.1016/j.algal.2016.10.010.
4. Olsson, J.; Feng, X.M.; Ascue, J.; Gentili, F.G.; Shabimam, M.A.; Nehrenheim, E.; Thorin, E. Co-digestion of cultivated microalgae and sewage sludge from municipal waste water treatment. *Bioresour. Technol.* 2014, 171, 203–210, doi:10.1016/j.biortech.2014.08.069.
5. Caporgno, M.P.; Trobajo, R.; Caiola, N.; Ibáñez, C.; Fabregat, A.; Bengoa, C. Biogas production from sewage sludge and microalgae co-digestion under mesophilic and thermophilic conditions. *Renew. Energy* 2015, 75, 374–380, doi:10.1016/j.renene.2014.10.019.
6. Beltrán, C.; Jeison, D.; Fermoso, F.G.; Borja, R. Batch anaerobic co-digestion of waste activated sludge and microalgae (*Chlorella sorokiniana*) at mesophilic temperature. *J. Environ. Sci. Heal. - Part A Toxic/Hazardous Subst. Environ. Eng.* 2016, 51, 847–850, doi:10.1080/10934529.2016.1181456.
7. Wang, M.; Park, C. Investigation of anaerobic digestion of *Chlorella* sp. and *Micractinium* sp. grown in high-nitrogen wastewater and their co-digestion with waste activated sludge. *Biomass and Bioenergy* 2015, 80, 30–37, doi:10.1016/j.biombioe.2015.04.028.
8. Wickham, R.; Galway, B.; Bustamante, H.; Nghiem, L.D. Biomethane potential evaluation of co-digestion of sewage sludge and organic wastes. *Int. Biodeterior. Biodegrad.* 2016, 113, 3–8, doi:10.1016/j.ibiod.2016.03.018.
9. Elalami, D.; Monlau, F.; Carrere, H.; Abdelouahdi, K.; Charbonnel, C.; Oukarroum, A.; Zeroual, Y.; Barakat, A. Evaluation of agronomic properties of digestate from macroalgal residues anaerobic digestion: Impact of pretreatment and co-digestion with waste activated sludge. *Waste Manag.* 2020, 108, 127–136, doi:10.1016/j.wasman.2020.04.019.
10. Arias, D.M.; Solé-Bundó, M.; Garfí, M.; Ferrer, I.; García, J.; Uggetti, E. Integrating microalgae tertiary treatment into activated sludge systems for energy and nutrients recovery from wastewater. *Bioresour. Technol.* 2018, 247, 513–519, doi:10.1016/j.biortech.2017.09.123.
11. Zhang, L.; Li, F.; Kuroki, A.; Loh, K.; Wang, C.; Dai, Y. Methane yield enhancement of mesophilic and thermophilic anaerobic co-digestion of algal biomass and food waste using algal biochar: Semi-continuous operation and microbial community analysis. *Bioresour. Technol.* 2020, 302, 122892, doi:10.1016/j.biortech.2020.122892.
12. Negro, V.; Alvarado-Morales, M.; Tsapekos, P.; Fino, D.; Ruggeri, B.; Angelidaki, I. Co-digestion of orange peels and marine seaweed with cattle manure to suppress inhibition from toxicants. *Biomass Convers. Biorefinery* 2020, doi:10.1007/s13399-020-00912-w.
13. Solé-bundó, M.; Garfí, M.; Ferrer, I. Pretreatment and co-digestion of microalgae, sludge and fat oil and grease (FOG) from microalgae-based wastewater treatment plants. *Bioresour. Technol.* 2020, 298, 122563, doi:10.1016/j.biortech.2019.122563.
14. Dar, R.A.; Arora, M.; Phutela, U.G. Optimization of cultural factors of newly isolated microalga *Spirulina subsalsa* and its co-digestion with paddy straw for enhanced biogas production. *Bioresour. Technol. Reports* 2019, 5, 185–198, doi:10.1016/j.biteb.2019.01.009.
15. Zhong, W.; Zhang, Z.; Luo, Y.; Qiao, W.; Xiao, M.; Zhang, M. Biogas productivity by co-digesting Taihu blue algae with corn straw as an external carbon source. *Bioresour. Technol.* 2012, 114, 281–286, doi:10.1016/j.biortech.2012.02.111.
16. Tsapekos, P.; Kougias, P.G.; Alvarado-Morales, M.; Kovalovszki, A.; Corbière, M.; Angelidaki, I. Energy recovery from wastewater microalgae through anaerobic digestion process: Methane potential, continuous reactor operation and modelling aspects. *Biochem. Eng. J.* 2018, 139, 1–7, doi:10.1016/j.bej.2018.08.004.
17. Meneses-Reyes, J.C.; Hernández-Eugenio, G.; Huber, D.H.; Balagurusamy, N.; Espinosa-Solares, T. Biochemical methane potential of oil-extracted microalgae and glycerol in co-digestion with chicken litter. *Bioresour. Technol.* 2017, 224, 373–379, doi:10.1016/j.biortech.2016.11.012.
18. Grosser, A. Determination of methane potential of mixtures composed of sewage sludge, organic fraction of municipal waste and grease trap sludge using biochemical methane potential assays. A comparison of BMP tests and semi-continuous trial results. *Energy* 2018, 143, 488–499, doi:10.1016/j.energy.2017.11.010.

19. Ganesh Saratale, R.; Kumar, G.; Banu, R.; Xia, A.; Periyasamy, S.; Dattatraya Saratale, G. A critical review on anaerobic digestion of microalgae and macroalgae and co-digestion of biomass for enhanced methane generation. *Bioresour. Technol.* 2018, 262, 319–332, doi:10.1016/j.biortech.2018.03.030.
20. Di Capua, F.; Spasiano, D.; Giordano, A.; Adani, F.; Fratino, U.; Pirozzi, F.; Esposito, G. High-solid anaerobic digestion of sewage sludge: challenges and opportunities. *Appl. Energy* 2020, 278, 115608, doi:10.1016/j.apenergy.2020.115608.

## Nomenclature

AB—algae biomass

AcD—anaerobic co-digestion,

AD—anaerobic digestion

BMP—biochemical methane potential

C/N—carbon to nitrogen ratio,

FAN—free ammonia nitrogen (mg/L),

FCBWiŚ—fizyczne chemiczne badanie wody i ścieków (Physicochemical examination of water and wastewater)

GTS—grease trap sludge,

HSD—honestly significant difference,

IN—inoculum,

LDS—liquid displacement system,

LF—logistic function,

M—mesophilic temperature,

MG—modified Gompertz model,

M-I—sewage sludge standalone,

M-II—algae biomass standalone,

M-III—algae biomass plus sewage sludge,

M-IV—algae biomass plus sewage sludge plus grease trap sludge,

M-V—algae biomass plus sewage sludge plus organic fraction of municipal sewage waste,

N-NH<sub>4</sub><sup>+</sup>—ionized ammonium nitrogen (mg/L),

NPOC—non-purgeable organic carbon (g/L),

OFMSW—organic fraction of municipal sewage waste,

P—pressure (Pa),

$P_m$ —potential methane yield (N mL-CH<sub>4</sub>/g-VS<sub>add</sub>),

$R_m$ —maximum rate of methane yield (N mL-CH<sub>4</sub> \* g-VS<sub>add</sub><sup>-1</sup> \* d<sup>-1</sup>),

SMEWW—Standard methods for the examination of water and wastewater,

SS—sewage sludge,

STP—standard temperature and pressure, successfully

T—temperature (K),

T—thermophilic temperature,

TC—total carbon (mg/g-TS),

TF—transference function,

TS—total solids (%),

VFA—volatile fatty acids (mg/L),

VS—volatile solids (%),

WWTP—wastewater treatment plant,

$Y_B$ —cumulative specific biogas yield (N mL/g-VS<sub>add</sub>),

$Y_m$ —cumulative specific methane yield (N mL-CH<sub>4</sub>/g-VS<sub>add</sub>),

$\lambda$ —lag phase time (d).
